# Supplementary material for: Nrf2, the Major Regulator of the Cellular Oxidative Stress Response, is Partially Disordered
Source: MDPI journal article supplement (doi:10.3390/ijms22147434), 2021-07-11
Supplement: s1 [file s1]

## Supplemental Materials

### **Nrf2, the major regulator of cellular oxidative stress response, is partially disordered**

Nadun C. Karunatileke <sup>1</sup>, Courtney S. Fast <sup>2</sup>, Vy Ngo <sup>3</sup>, Anne Brickenden <sup>1</sup>,  
Martin L. Duennwald <sup>3</sup>, Lars Konermann <sup>1,2,\*</sup> and Wing-Yiu Choy <sup>1,2,\*</sup>

<sup>1</sup> Department of Biochemistry, The University of Western Ontario, London, Ontario, Canada N6A 5C1

<sup>2</sup> Department of Chemistry, The University of Western Ontario, London, Ontario, Canada N6A 5B7

<sup>3</sup> Department of Pathology and Laboratory Medicine, The University of Western Ontario, London, Ontario, Canada N6A 5C1

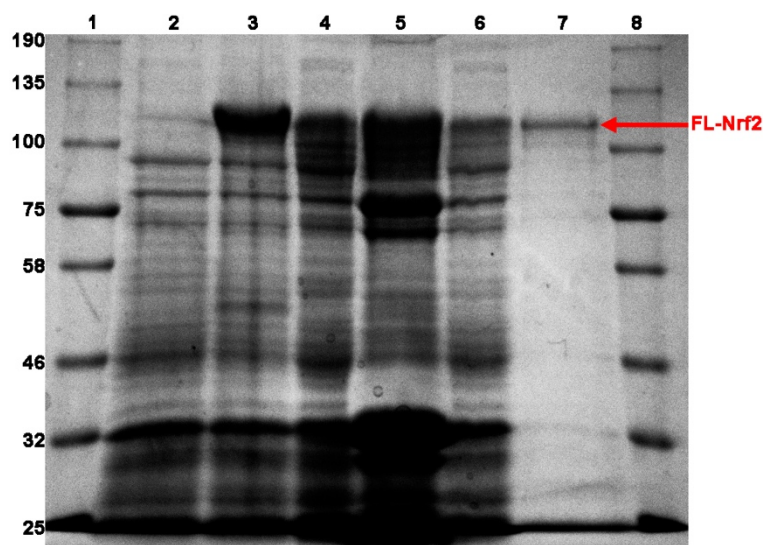

**Figure S1.** SDS-PAGE analysis of the FL-Nrf2 at different purification steps. Samples were run on a 10% polyacrylamide gel. Lane 1, molecular weight marker; lane 2, pre-induction sample; lane 3, post-induction sample; lane 4, soluble fraction; lane 5, insoluble fraction; lane 6, unbound fraction, lane 7, elution (pointed from red letters), and lane 8, molecular weight marker.

**A**

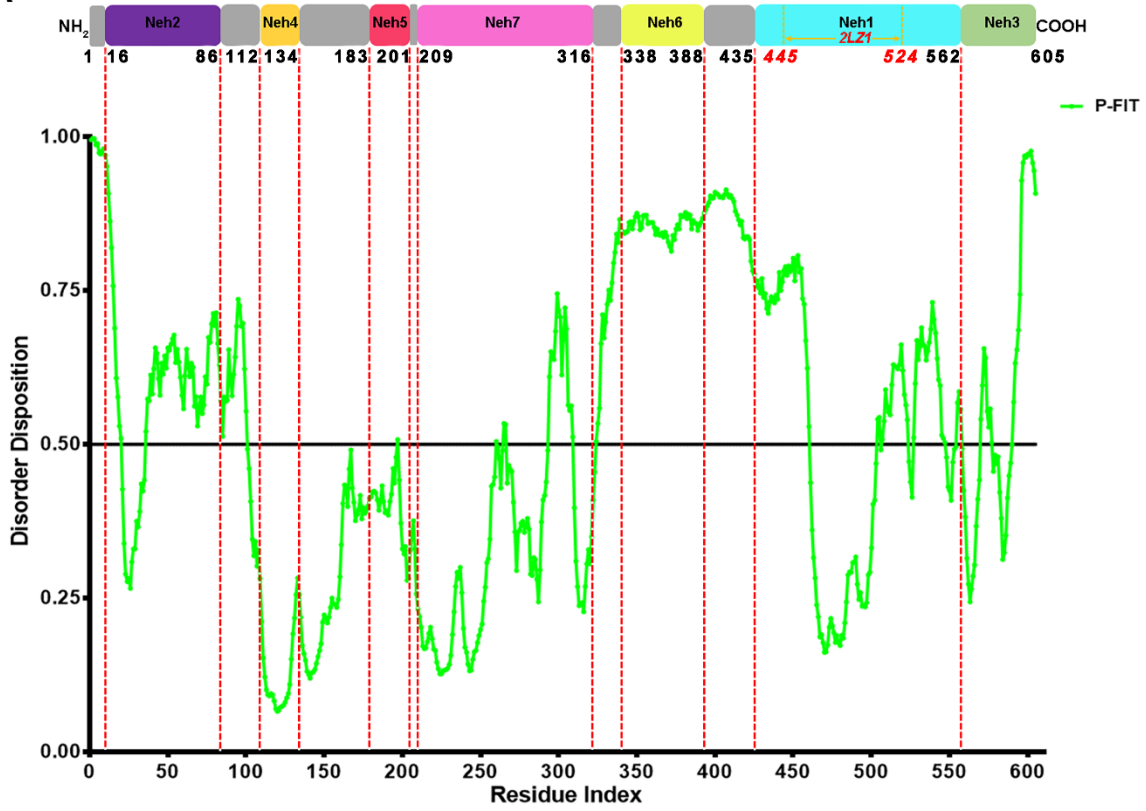

**B**

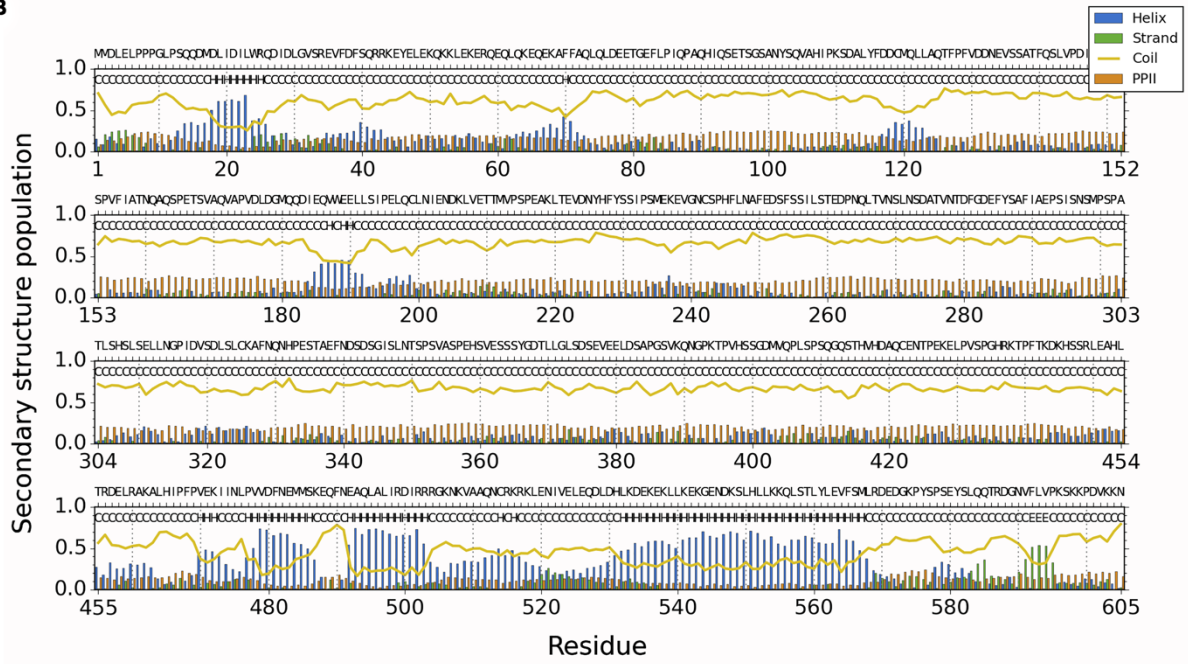

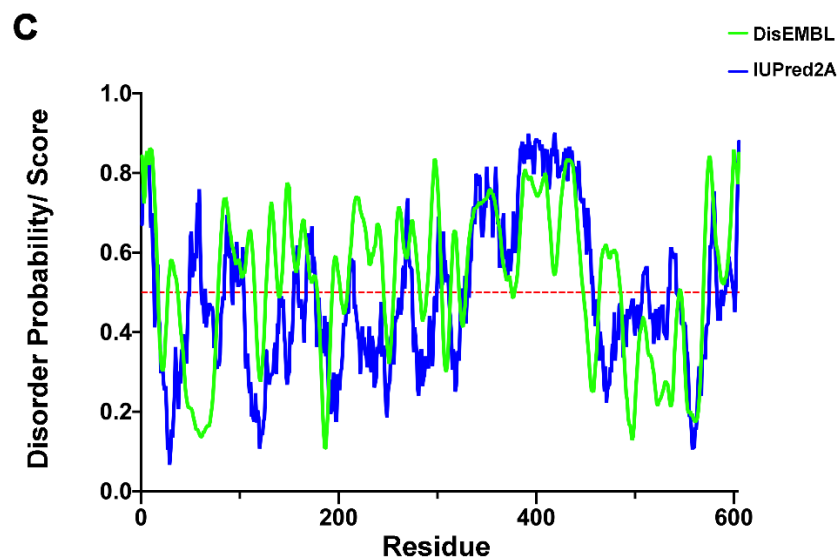

**Figure S2.** Bioinformatics predictions of the structural properties of FL-Nrf2. **(A)** Prediction of protein disorder with PONDR-FIT (P-FIT). Regions with y-axis values greater than 0.5 are predicted to be disordered. **(B)** Secondary structure propensity prediction of Nrf2 with s2D, **(C)** DisEMBL and IUPred2A disorder predictions.

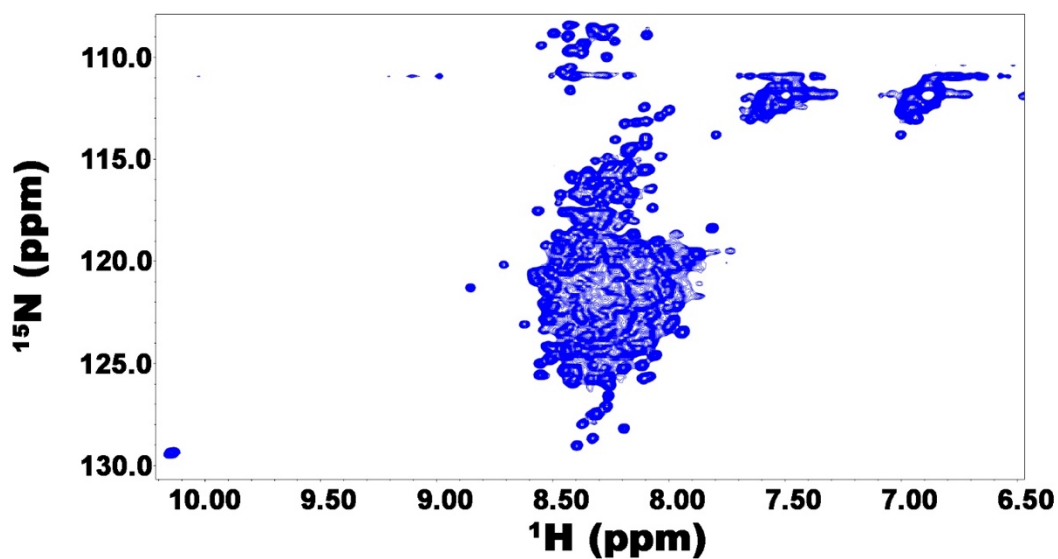

**Figure S3.**  $^1\text{H}$ - $^{15}\text{N}$  HSQC spectrum of FL-Nrf2 ( $\sim 20\ \mu\text{M}$ ) recorded at  $35\ ^\circ\text{C}$  in the presence of 6 M urea.

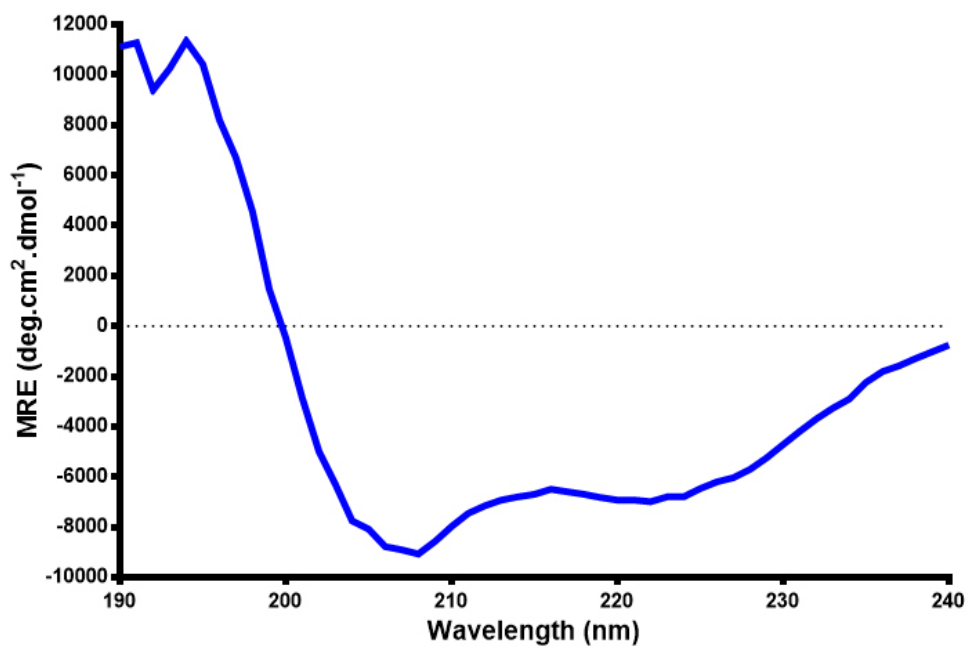

**Figure S4.** The CD spectrum (average of 20 scans) of Neh1-2LZ1 recorded at  $20\ ^\circ\text{C}$ .

**A**

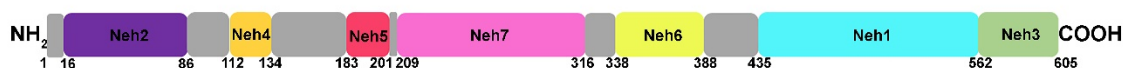

**B**

MS YYHHHHHHLE STSLYKKAGT

<sup>2</sup>MDLELPPPG LPSQQDMDLI DILWRQDIDL GVSREVFDFS

QRRKEYELEK QKKLEKERQE QLQKEQEKAF FAQLQLDEET

GEFLPIQPAQ HIQSETSGSA NYSQVAHIPK SDALYFDDCM

QLLAQTFPFV DDNEVSSATF QSLVPDIPGH IESPVFIATN

QAQSPETSVA QVAPVDLDGM QQDIEQVWEE LLSIPELQCL

NIENDKLVET TMVPSPEAKL TEVDNYHFYS SIPSMEKEVG

NCSPHFLNAF EDSFSSILST EDPNQLTVNS LNSDATVNTD

FGDEFYSAFI AEPSOSMSMP SPATLSHSLS ELLNGPIDVS

DLSKCKAFNQ NHPESTAEFN DSDSGISLNT SPSVASPEHS

VESSSYGDTL LGLSDSEVEE LDSAPGSVKQ NGPKTPVHSS

GDMVQPLSPS QGQSTHVHDA QCENTPEKEL PVSPGHRKTP

FTKDKHSSRL EAHLTRDEL R AKALHIPFPV EKIINLPVVD

FNEMMSKEQF NEAQLALIRD IRRRGKNKVA AQNCRKRKLE

NIVELEQDL D HLKDEKEKLL KEKGENDKSL HLLKKQLSTL

YLEVFSMLRD EDGKPYSPSE YSLQQTRDGN VFLVPKSKKP

DVKKN<sup>605</sup>

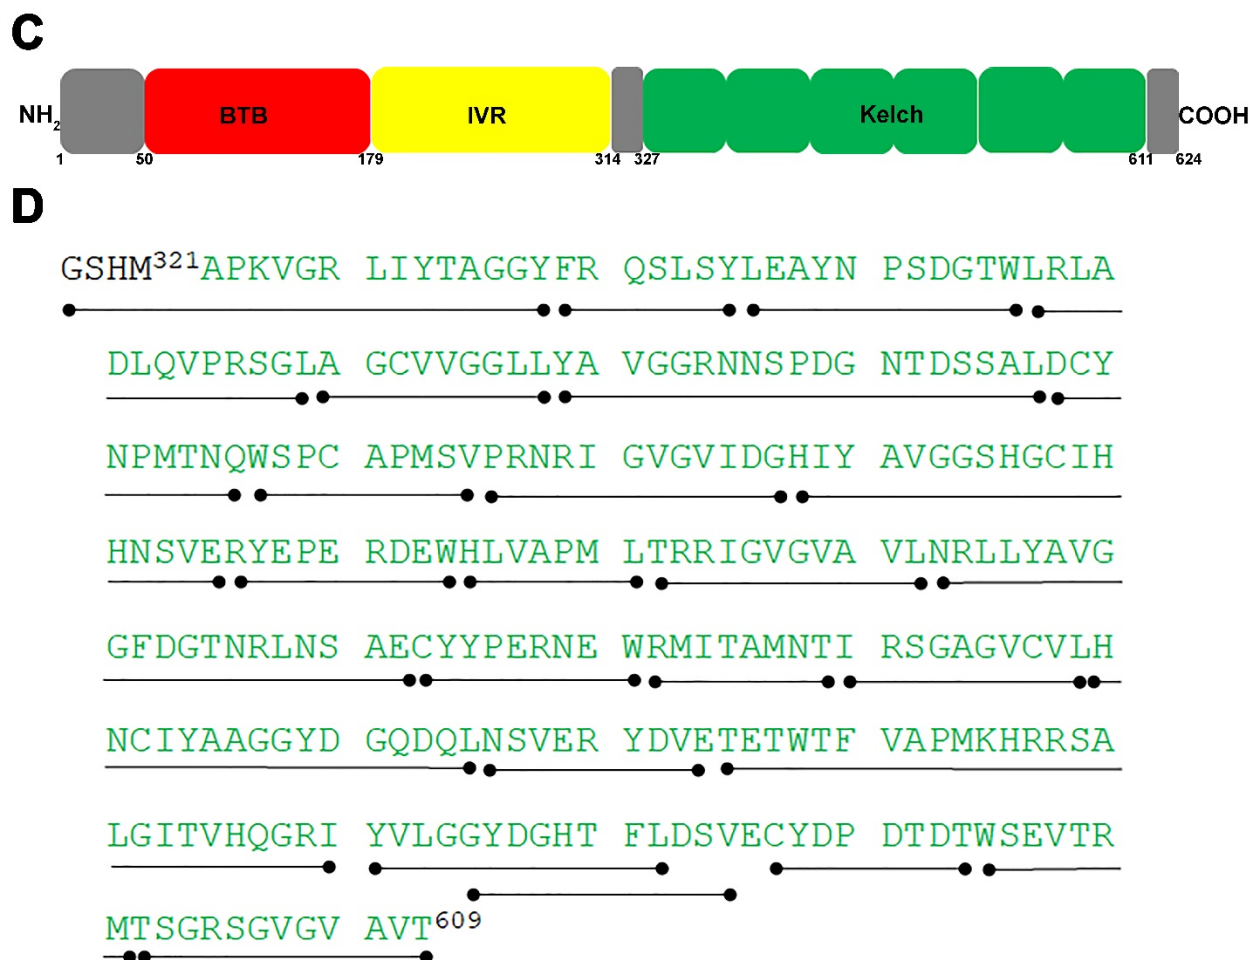

**Figure S5. Peptide coverage of FL-Nrf2 and Kelch domain of Keap1.** (A) FL-Nrf2 consists of seven domains: Nrf2-ECH homology (Neh) 1-7 domains (B) HDX-MS experiments of FL-Nrf2 yielded 101 peptides resulting in 86.3% of overall sequence coverage. MSYYHHHHHHLESTSLYKKAGT is the N-terminal His-tag (C) Keap1 consists of three domains: the BTB, IVR, and Kelch domain. (D) HDX-MS experiments of Kelch yielded 109 peptides resulting in 99.7% of overall sequence coverage. The N-terminal GSHM are residual residues from the removed His-tag.

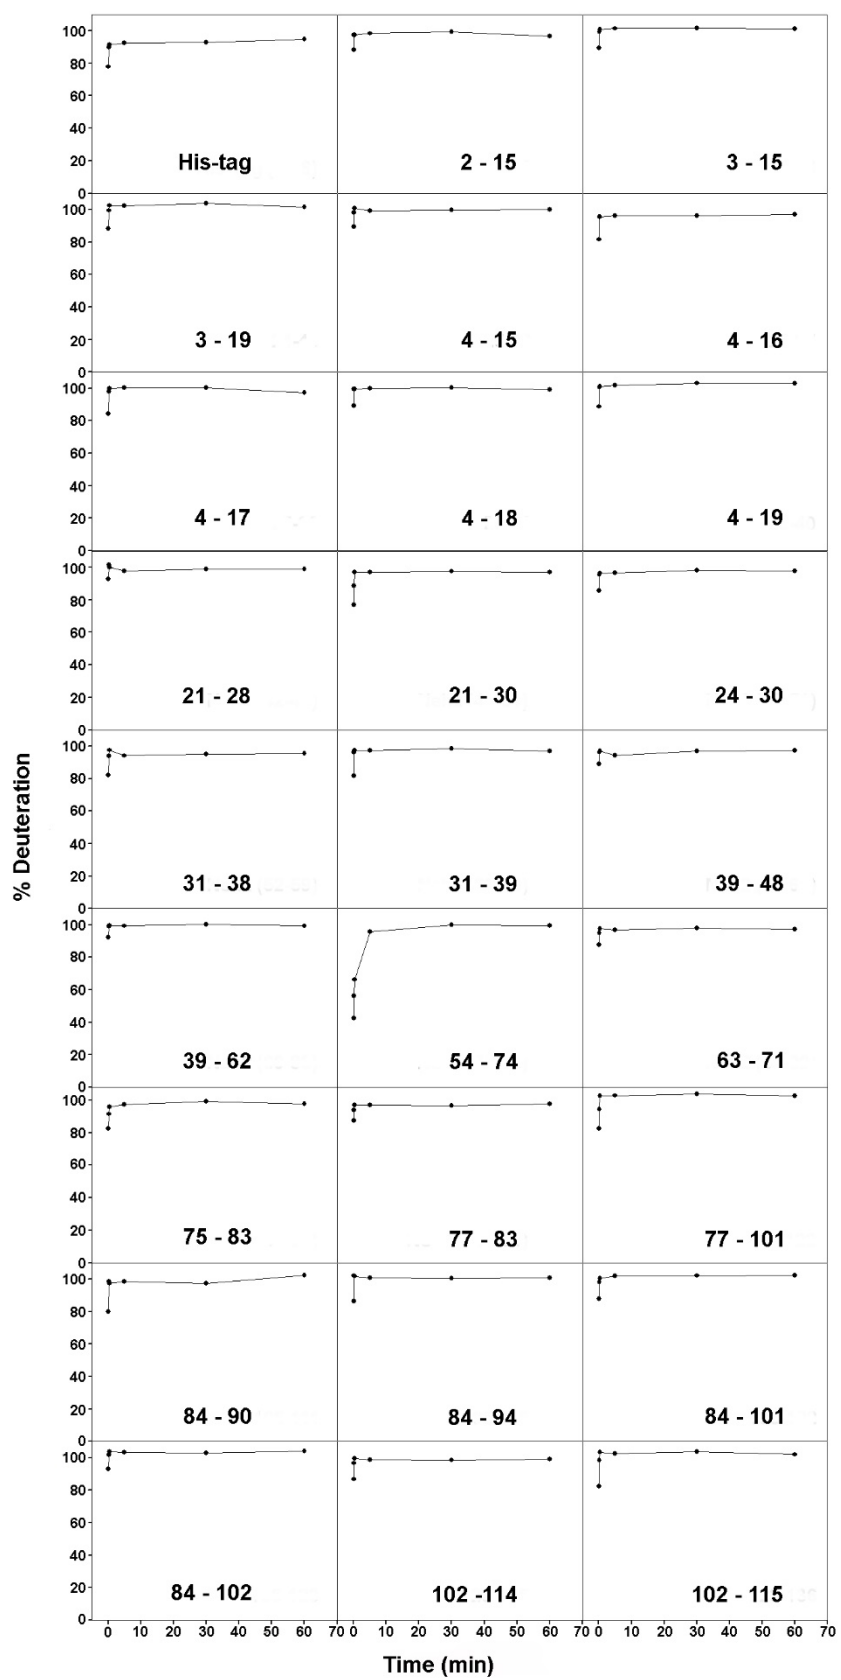



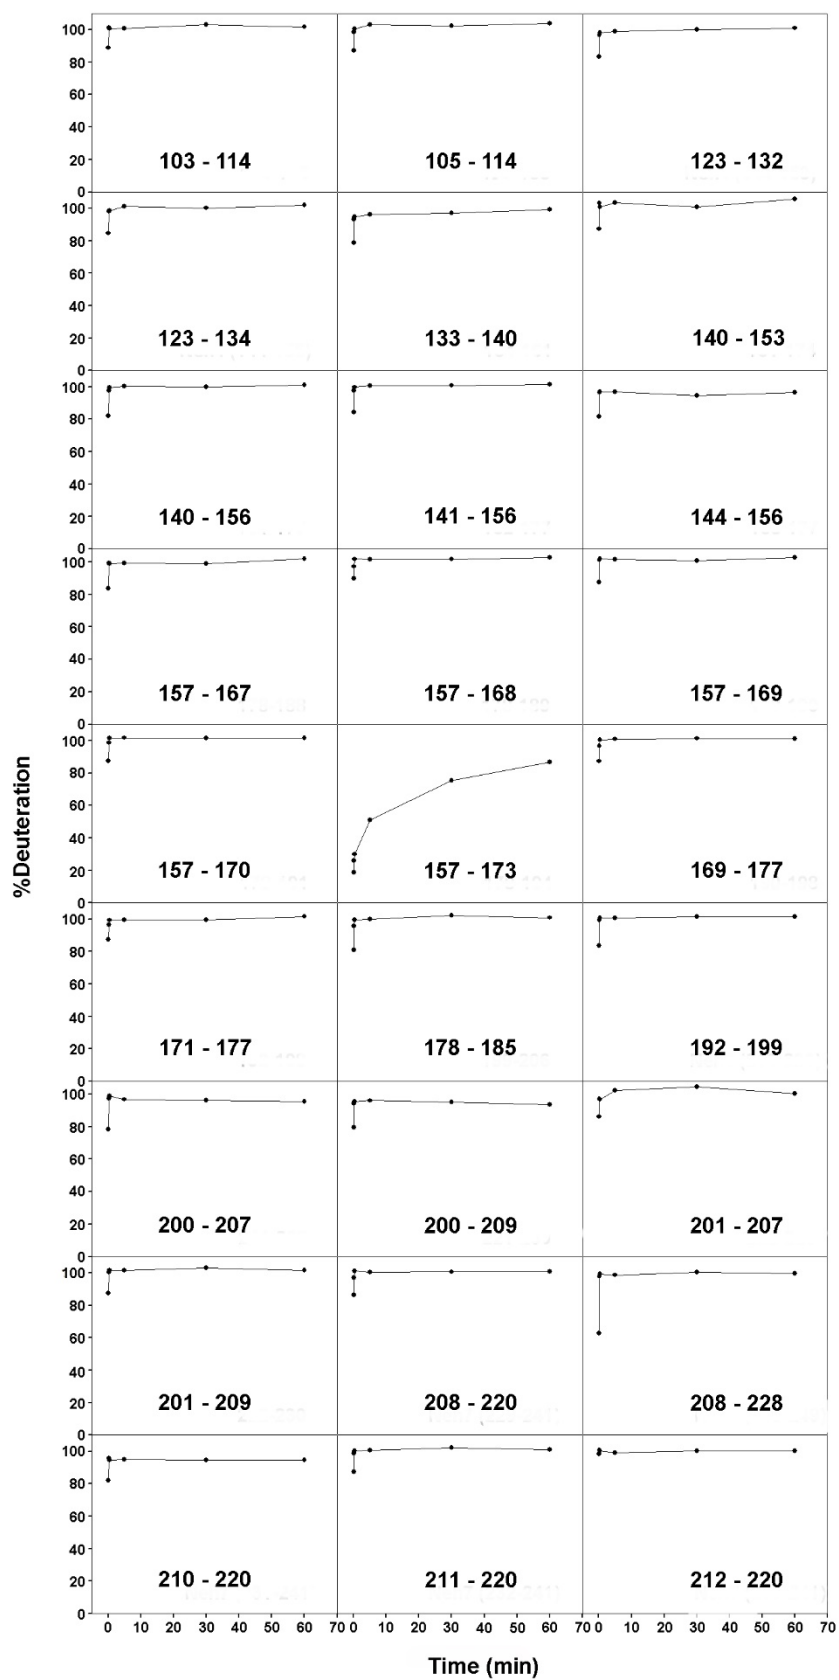

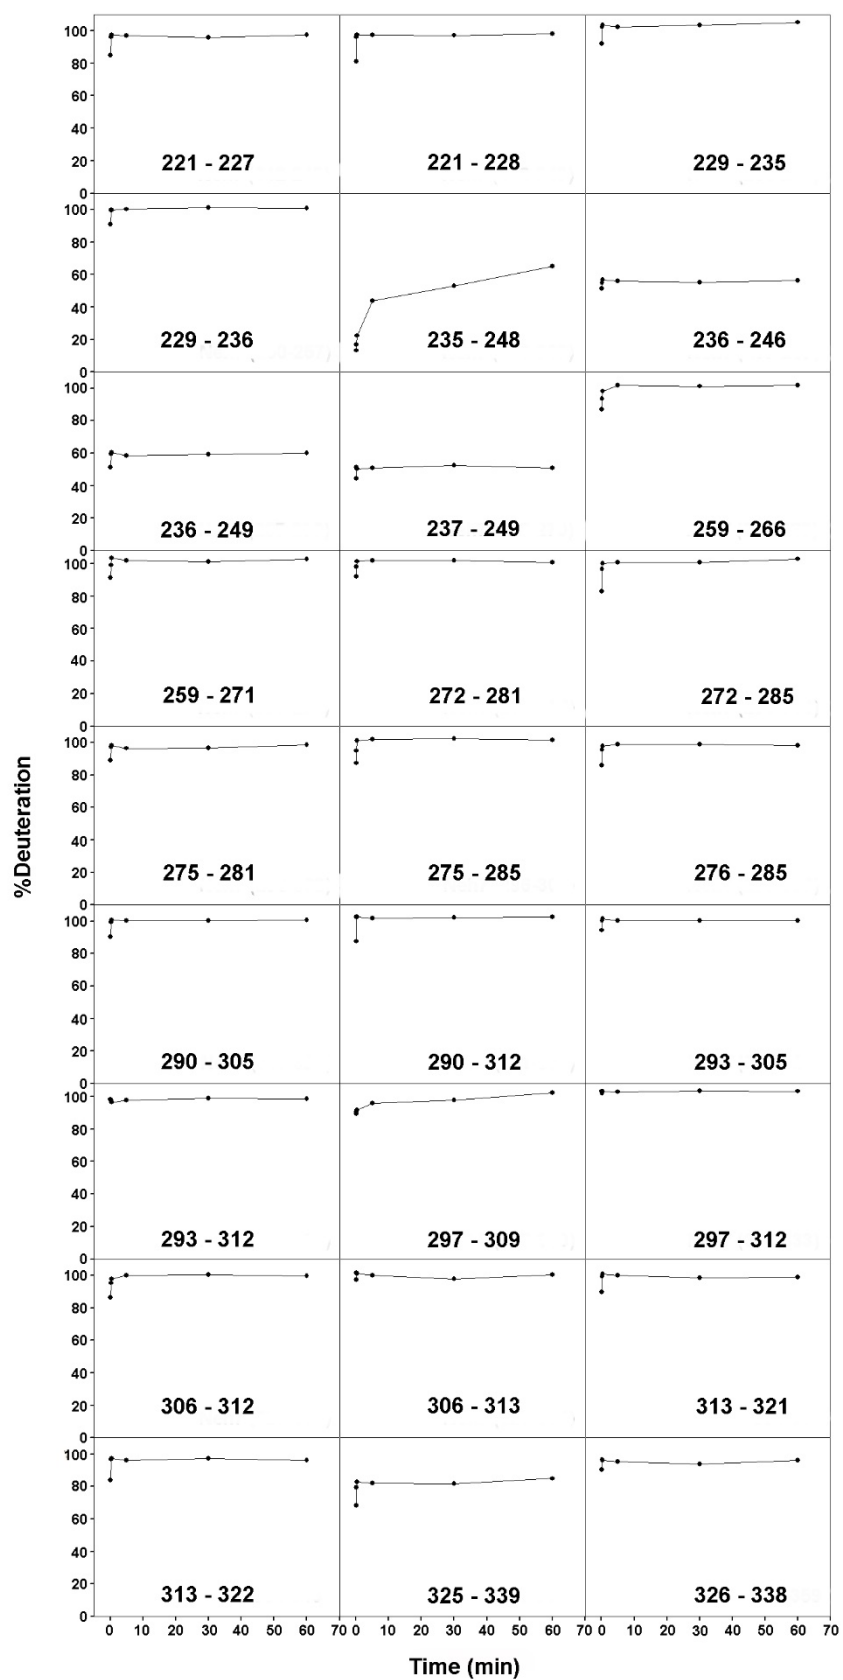

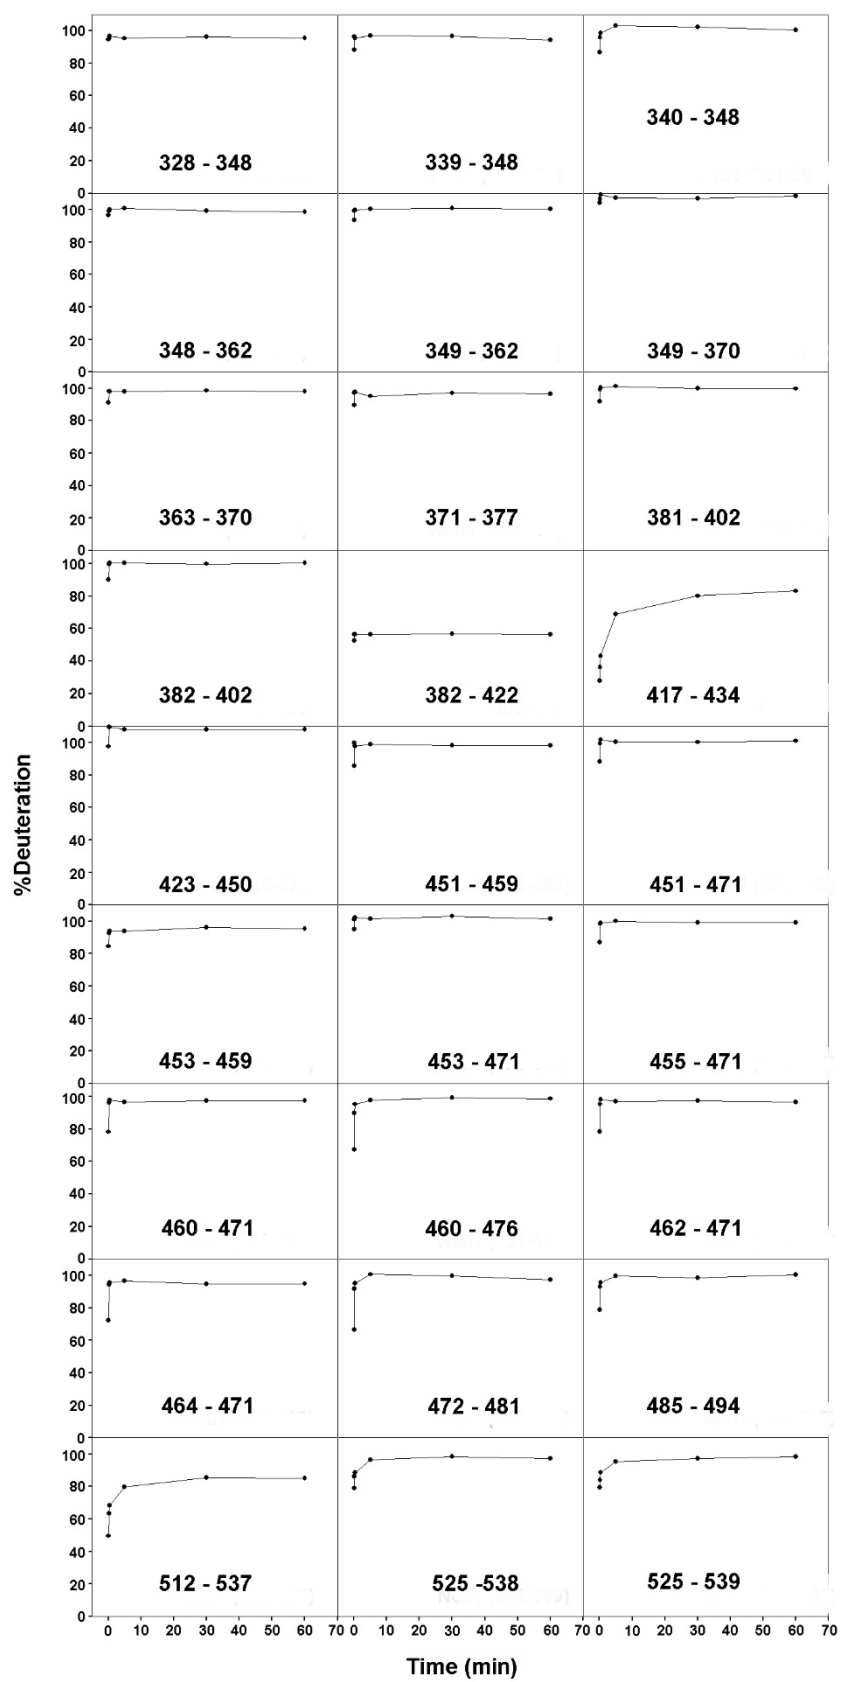

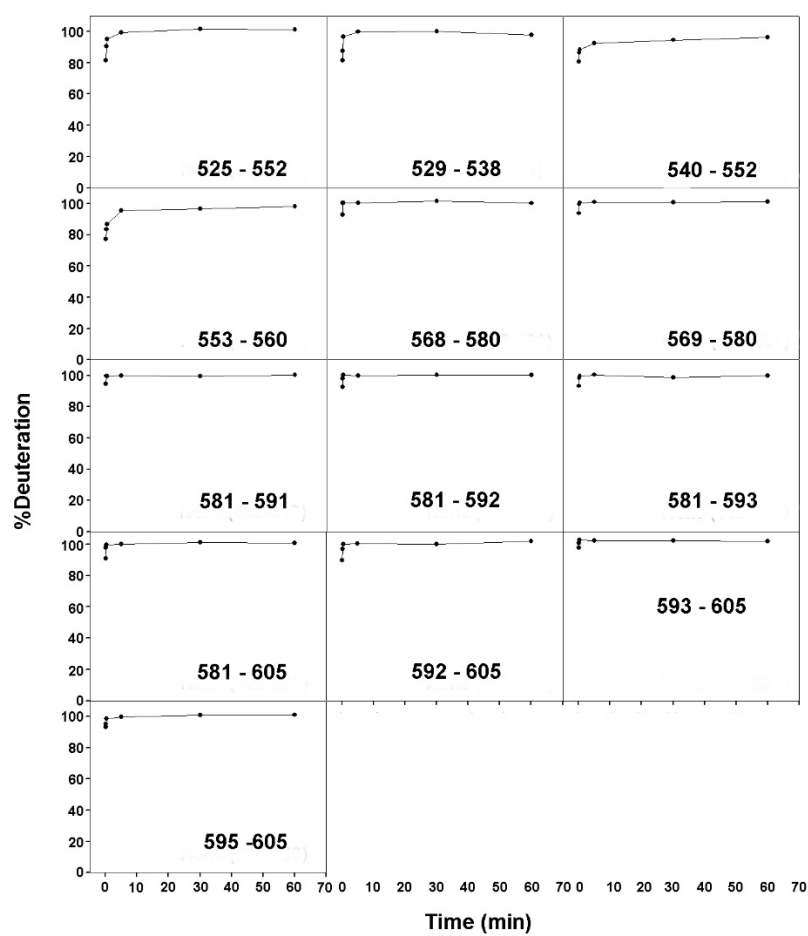

**Figure S6.** HDX data suggest the majority of FL-Nrf2 is not protected (Panels 1-5)

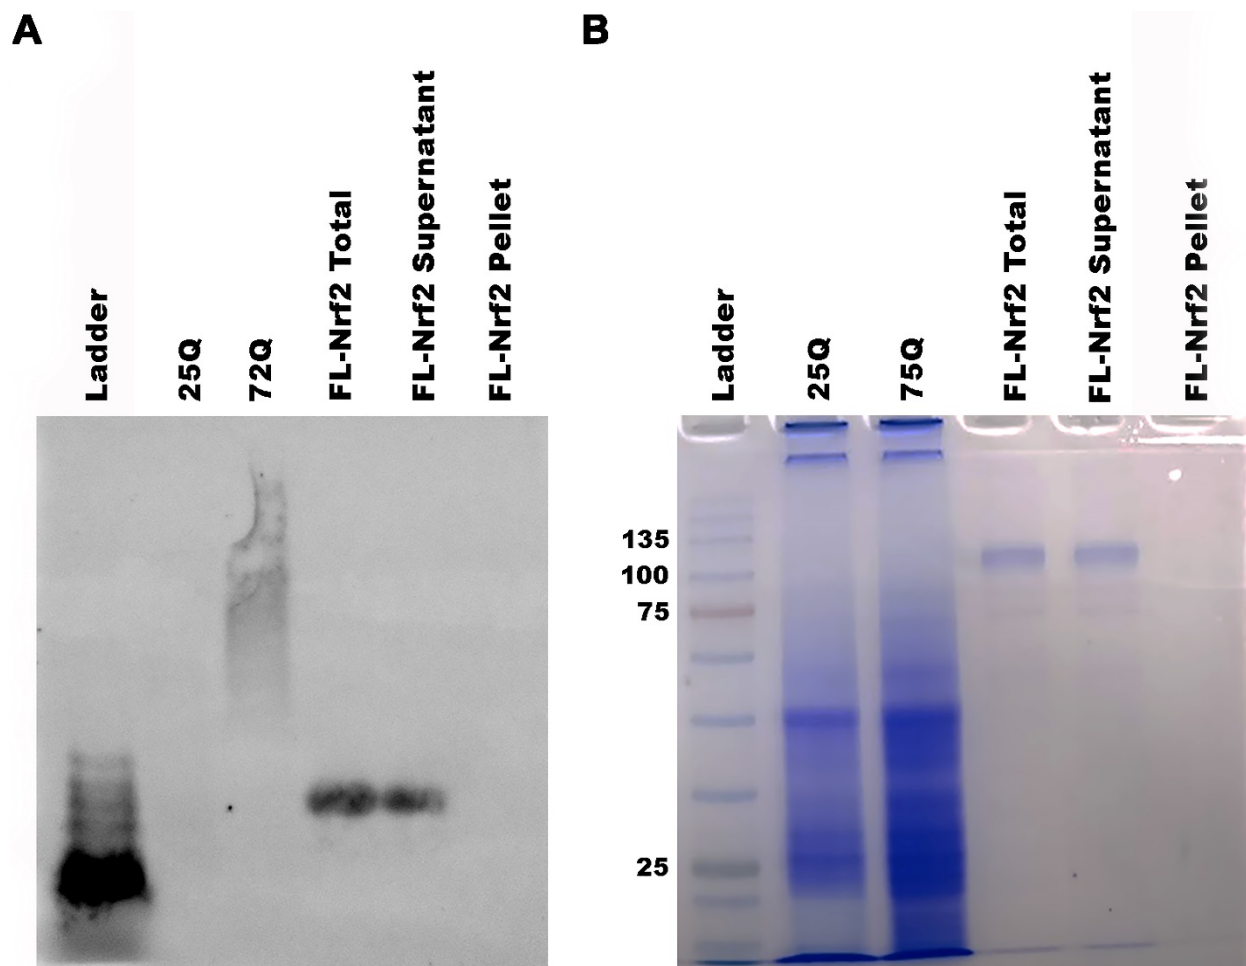

**Figure S7.** The (A) SSD-AGE and (B) SDS-PAGE results of the sedimentation assay show that the FL-Nrf2 does not form aggregates at low concentrations. The 25Q Htt protein, which does not aggregate, is used as the negative control, while the aggregated 75Q Htt is used as the positive control (The procedure of the sedimentation assay is outlined at the end of the Supplemental Materials).

**Table S1.** Estimate secondary structural contents presence in FL-Nrf2 at different temperatures. CD spectra were deconvoluted using DichroWeb. Analysis program CONTINLL with the reference set 4 was used for the deconvolution.

| <b>Temperature<br/>(°C)</b> | <b>Estimated Secondary Structural Content (%)</b> |               |                         |
|-----------------------------|---------------------------------------------------|---------------|-------------------------|
|                             | <b>Helix</b>                                      | <b>Strand</b> | <b>Turns/Disordered</b> |
| 5                           | 28.9                                              | 16.8          | 54.3                    |
| 10                          | 30.0                                              | 15.5          | 54.5                    |
| 25                          | 26.7                                              | 21.0          | 52.3                    |
| 35                          | 17.7                                              | 26.9          | 55.4                    |

## **The procedure of the sedimentation assay**

The solubility of FL-Nrf2 was analyzed by the sedimentation assay to partition the soluble and aggregated protein molecules into supernatant and pellet for analysis.

### *Sample preparation*

An aliquot of purified protein representing the “total” fraction was centrifuged at 10,000 x g for 10 minutes at 4 °C. The resultant supernatant represented the “supernatant” fraction; the pellet was resuspended in an equal volume of dialysis buffer and represented the “pellet” fraction. 2 µg of “total” purified protein and an equivalent volume of the “supernatant” and “pellet” fractions were boiled at 100 °C for 4 minutes and pulse-spun prior to SDD-AGE and SDS-PAGE analysis.

A positive control and a negative control were used along with the FL-Nrf2 fractions. In Huntington’s disease, abnormal expansion of the polyglutamine (polyQ) repeat in the huntingtin (Htt) protein confers toxic function(s) to mutant Htt, which can lead to neurodegeneration. The longer the polyQ expansion, the more toxic and aggregation-prone the Htt protein is. The 25Q Htt protein, which does not aggregate is used as the negative control, while the aggregated 75Q Htt is used as the positive control.

### *Semi-Denaturing Detergent Agarose Gel Electrophoresis (SDD-AGE)*

The protein samples were resolved on an 1.8% agarose-2% SDS gel. The transfer stacks were assembled according to the protocol provided by the supplier (Whatman TurboBlotter Transfer System), and the gel was transferred to PVDF by an overnight wet transfer by capillary force at room temperature with 1X TBS. The membrane was blocked with 5% milk in PBST and incubated with rabbit anti-Nrf2 (sc-722; Santa Cruz Biotechnology) primary antibody in 2% bovine serum albumin (BSA) overnight at 4 °C. The membrane was then incubated with goat anti-rabbit Alexa

Fluor 680 (A-21076; Invitrogen) secondary antibody for 1 h at room temperature. Images were taken using the Gel Doc XR+ System (Bio-Rad).

### *SDS-PAGE*

Protein samples were resolved on a 10% SDS-PAGE gel. The gel was incubated in 50 mL of Coomassie Brilliant Blue staining solution (50% methanol (v/v), 10% glacial acetic acid (v/v), 40% H<sub>2</sub>O, 1 g/L of Coomassie Brilliant Blue (Bio-Rad)) at room temperature for 30 minutes and destained with Coomassie Brilliant Blue destaining solution (40% methanol (v/v), 10% glacial acetic acid (v/v), 50% H<sub>2</sub>O]) overnight.
